# Supplementary material for: Acute myeloid leukemia-derived extracellular vesicles induced DNA methylation changes responsible for inflammatory program in normal hematopoietic stem progenitor cells
Source: Front Immunol. 2025 Apr 10;16:1569159. doi: 10.3389/fimmu.2025.1569159 (PMC12018244; doi:10.3389/fimmu.2025.1569159)
Supplement: Supplementary file 7 [file Table6.xlsx]

## Sheet: Sheet 1
Supplementary table 6: Pathways analysis of 93 common hypomethylated genes
ID	Description	GeneRatio	BgRatio	pvalue	p.adjust	geneID	Count
PHONG_TNF_RESPONSE_NOT_VIA_P38	PHONG_TNF_RESPONSE_NOT_VIA_P38	13/77	341/22091	1.70009e-10	3.63989e-07	ABCA1/TNFRSF10B/NFE2L3/CD47/SMAD3/TNIP2/DSE/JAK1/BCL2A1/B4GALT5/NFKB1/LRIG1/ABTB2	13
ZHANG_RESPONSE_TO_IKK_INHIBITOR_AND_TNF_UP	ZHANG_RESPONSE_TO_IKK_INHIBITOR_AND_TNF_UP	9/77	223/22091	8.23991e-08	8.82082e-05	TNFRSF10B/SMAD3/TNIP2/DSE/BCL2A1/B4GALT5/IRAK2/NFKB1/ABTB2	9		i processi generici
KEGG_APOPTOSIS	KEGG_APOPTOSIS	6/77	87/22091	5.93656e-07	0.000423673	TNFRSF10B/PPP3CA/BCL2/PIK3R5/IRAK2/NFKB1	6
ZHENG_BOUND_BY_FOXP3	ZHENG_BOUND_BY_FOXP3	11/77	498/22091	1.19539e-06	0.000639831	FOXP1/SMAD3/BCL2/UST/FAM107B/TG/NR5A2/JAK1/F2RL1/LRIG1/ABTB2	11		Tumori
KEGG_PANCREATIC_CANCER	KEGG_PANCREATIC_CANCER	5/77	70/22091	4.5734e-06	0.00195833	RAC1/SMAD3/JAK1/PIK3R5/NFKB1	5
PID_IL2_PI3K_PATHWAY	PID_IL2_PI3K_PATHWAY	4/77	34/22091	5.84371e-06	0.00208523	RAC1/BCL2/JAK1/NFKB1	4
ZHENG_FOXP3_TARGETS_IN_T_LYMPHOCYTE_DN	ZHENG_FOXP3_TARGETS_IN_T_LYMPHOCYTE_DN	4/77	38/22091	9.20347e-06	0.00281495	FOXP1/BCL2/JAK1/ABTB2	4
RYAN_MANTLE_CELL_LYMPHOMA_NOTCH_DIRECT_UP	RYAN_MANTLE_CELL_LYMPHOMA_NOTCH_DIRECT_UP	6/77	148/22091	1.30915e-05	0.0035036	BLK/SMAD3/UST/DSE/NEDD9/BCL2A1	6
WP_APOPTOSIS_MODULATION_AND_SIGNALING	WP_APOPTOSIS_MODULATION_AND_SIGNALING	5/77	92/22091	1.75065e-05	0.00416459	BLK/TNFRSF10B/BCL2/BCL2A1/NFKB1	5
SILIGAN_BOUND_BY_EWS_FLT1_FUSION	SILIGAN_BOUND_BY_EWS_FLT1_FUSION	4/77	46/22091	1.99211e-05	0.00426512	TNFRSF10B/TNRC6A/NR5A2/CCRL2	4
ZHOU_INFLAMMATORY_RESPONSE_LIVE_UP	ZHOU_INFLAMMATORY_RESPONSE_LIVE_UP	9/77	450/22091	2.64003e-05	0.00513846	ABCA1/PXDN/TNIP2/CCRL2/B4GALT5/CNKSR3/IRAK2/NFKB1/ATXN1	9
QI_PLASMACYTOMA_UP	QI_PLASMACYTOMA_UP	7/77	254/22091	2.96419e-05	0.00528861	BLK/CD47/WDR1/ALOX5AP/BCL2/SLA/SEMA4A	7
WP_DNA_DAMAGE_RESPONSE_ONLY_ATM_DEPENDENT	WP_DNA_DAMAGE_RESPONSE_ONLY_ATM_DEPENDENT	5/77	110/22091	4.14959e-05	0.00613629	RAC1/SMAD3/BCL2/PIK3R5/NFKB1	5
PID_TXA2PATHWAY	PID_TXA2PATHWAY	4/77	56/22091	4.36701e-05	0.00613629	BLK/ROCK1/RAC1/PIK3R5	4
WP_HEPATITIS_C_AND_HEPATOCELLULAR_CARCINOMA	WP_HEPATITIS_C_AND_HEPATOCELLULAR_CARCINOMA	4/77	56/22091	4.36701e-05	0.00613629	RAC1/SMAD3/JAK1/NFKB1	4
YAGI_AML_WITH_T_8_21_TRANSLOCATION	YAGI_AML_WITH_T_8_21_TRANSLOCATION	8/77	372/22091	4.58573e-05	0.00613629	PXDN/ETV6/RPP30/DDAH2/SLA/JAK1/NFKB1/ATXN1	8
WP_VITAMIN_D_IN_INFLAMMATORY_DISEASES	WP_VITAMIN_D_IN_INFLAMMATORY_DISEASES	3/77	22/22091	5.97811e-05	0.00744301	PPP3CA/SMAD3/NFKB1	3
KEGG_COLORECTAL_CANCER	KEGG_COLORECTAL_CANCER	4/77	62/22091	6.52857e-05	0.00744301	RAC1/SMAD3/BCL2/PIK3R5	4
CLIMENT_BREAST_CANCER_COPY_NUMBER_UP	CLIMENT_BREAST_CANCER_COPY_NUMBER_UP	3/77	23/22091	6.8576e-05	0.00744301	SLA/TG/MTSS1	3
PID_BCR_5PATHWAY	PID_BCR_5PATHWAY	4/77	63/22091	6.95284e-05	0.00744301	RAC1/PPP3CA/BCL2A1/NFKB1	4
KEGG_NEUROTROPHIN_SIGNALING_PATHWAY	KEGG_NEUROTROPHIN_SIGNALING_PATHWAY	5/77	126/22091	7.92916e-05	0.00808396	RAC1/BCL2/PIK3R5/IRAK2/NFKB1	5
WP_AGE_RAGE_PATHWAY	WP_AGE_RAGE_PATHWAY	4/77	66/22091	8.34627e-05	0.00812244	ROCK1/RAC1/SMAD3/NFKB1	4
PID_PDGFRB_PATHWAY	PID_PDGFRB_PATHWAY	5/77	129/22091	8.86376e-05	0.008251	BLK/RAC1/SLA/PIK3R5/KSR1	5
FOSTER_TOLERANT_MACROPHAGE_DN	FOSTER_TOLERANT_MACROPHAGE_DN	8/77	413/22091	9.51473e-05	0.00848793	TPST1/ETV6/SCHIP1/FOXP1/RIN2/B4GALT5/NFKB1/ABTB2	8
WP_UROTENSIN_II_MEDIATED_SIGNALING_PATHWAY	WP_UROTENSIN_II_MEDIATED_SIGNALING_PATHWAY	4/77	69/22091	9.9325e-05	0.00850619	ABCA1/SMAD3/BCL2/NFKB1	4
WP_LEPTIN_SIGNALING_PATHWAY	WP_LEPTIN_SIGNALING_PATHWAY	4/77	71/22091	0.000111047	0.00914431	ROCK1/RAC1/JAK1/NFKB1	4
WP_IL_19_SIGNALING_PATHWAY_MAP	WP_IL_19_SIGNALING_PATHWAY_MAP	3/77	28/22091	0.000125271	0.0096259	RAC1/JAK1/NFKB1	3
KEGG_B_CELL_RECEPTOR_SIGNALING_PATHWAY	KEGG_B_CELL_RECEPTOR_SIGNALING_PATHWAY	4/77	75/22091	0.000137457	0.0096259	RAC1/PPP3CA/PIK3R5/NFKB1	4
KEGG_PATHWAYS_IN_CANCER	KEGG_PATHWAYS_IN_CANCER	7/77	325/22091	0.000139243	0.0096259	RAC1/SMAD3/BCL2/JAK1/PIK3R5/SUFU/NFKB1	7
KEGG_MEDICUS_PATHOGEN_KSHV_VGPCR_TO_GNB_G_PI3K_JNK_SIGNALING_PATHWAY	KEGG_MEDICUS_PATHOGEN_KSHV_VGPCR_TO_GNB_G_PI3K_JNK_SIGNALING_PATHWAY	3/77	29/22091	0.000139375	0.0096259	RAC1/PIK3R5/NFKB1	3
YU_BAP1_TARGETS	YU_BAP1_TARGETS	3/77	29/22091	0.000139375	0.0096259	TNFRSF10B/UXS1/BCL2A1	3
MORI_PRE_BI_LYMPHOCYTE_DN	MORI_PRE_BI_LYMPHOCYTE_DN	4/77	80/22091	0.000176524	0.0118105	BLK/FAM107B/FCRLA/NFKB1	4
HUANG_GATA2_TARGETS_UP	HUANG_GATA2_TARGETS_UP	5/77	152/22091	0.00019146	0.0124217	STARD10/CD47/ALOX5AP/FAM107B/NEURL3	5
DUTTA_APOPTOSIS_VIA_NFKB	DUTTA_APOPTOSIS_VIA_NFKB	3/77	33/22091	0.000206033	0.012974	TNFRSF10B/BCL2/BCL2A1	3
HINATA_NFKB_TARGETS_KERATINOCYTE_UP	HINATA_NFKB_TARGETS_KERATINOCYTE_UP	4/77	84/22091	0.000213101	0.0130357	RAC1/MTSS1/BCL2A1/NFKB1	4
BIOCARTA_FMLP_PATHWAY	BIOCARTA_FMLP_PATHWAY	3/77	34/22091	0.000225407	0.0130431	RAC1/PPP3CA/NFKB1	3
PID_EPHA_FWDPATHWAY	PID_EPHA_FWDPATHWAY	3/77	34/22091	0.000225407	0.0130431	BLK/ROCK1/PIK3R5	3
GAVIN_FOXP3_TARGETS_CLUSTER_P3	GAVIN_FOXP3_TARGETS_CLUSTER_P3	5/77	161/22091	0.000250066	0.0140892	CD47/RIN2/JAK1/CCRL2/SEMA4A	5
WP_PANCREATIC_ADENOCARCINOMA_PATHWAY	WP_PANCREATIC_ADENOCARCINOMA_PATHWAY	4/77	89/22091	0.000266137	0.0146102	RAC1/SMAD3/JAK1/NFKB1	4
BLANCO_MELO_COVID19_SARS_COV_2_INFECTION_A594_ACE2_EXPRESSING_CELLS_RUXOLITINIB_UP	BLANCO_MELO_COVID19_SARS_COV_2_INFECTION_A594_ACE2_EXPRESSING_CELLS_RUXOLITINIB_UP	8/77	486/22091	0.000288498	0.0154419	SLA/MTSS1/NEURL3/BCL2A1/SEMA4A/IRAK2/NFKB1/ABTB2	8
WP_AMYOTROPHIC_LATERAL_SCLEROSIS_ALS	WP_AMYOTROPHIC_LATERAL_SCLEROSIS_ALS	3/77	38/22091	0.000314601	0.0164283	RAC1/PPP3CA/BCL2	3
ROZANOV_MMP14_TARGETS_UP	ROZANOV_MMP14_TARGETS_UP	6/77	267/22091	0.000340813	0.0173734	NFE2L3/PXDN/FOXN3/RIN2/FCRLA/LRIG1	6
WP_PDGF_PATHWAY	WP_PDGF_PATHWAY	3/77	40/22091	0.000366611	0.0182538	RAC1/JAK1/NFKB1	3
ONO_FOXP3_TARGETS_DN	ONO_FOXP3_TARGETS_DN	3/77	41/22091	0.000394565	0.0187725	FOXN3/BCL2/SEMA4A	3
PID_AMB2_NEUTROPHILS_PATHWAY	PID_AMB2_NEUTROPHILS_PATHWAY	3/77	41/22091	0.000394565	0.0187725	BLK/ROCK1/NFKB1	3
FOROUTAN_PRODRANK_TGFB_EMT_UP	FOROUTAN_PRODRANK_TGFB_EMT_UP	5/77	185/22091	0.000473369	0.0208337	ABCA1/TPST1/ALOX5AP/DSE/NEDD9	5
WP_MICRORNAS_IN_CARDIOMYOCYTE_HYPERTROPHY	WP_MICRORNAS_IN_CARDIOMYOCYTE_HYPERTROPHY	4/77	104/22091	0.000481816	0.0208337	ROCK1/RAC1/PPP3CA/NFKB1	4
BIOCARTA_TCR_PATHWAY	BIOCARTA_TCR_PATHWAY	3/77	44/22091	0.000486542	0.0208337	RAC1/PPP3CA/NFKB1	3
PID_CERAMIDE_PATHWAY	PID_CERAMIDE_PATHWAY	3/77	44/22091	0.000486542	0.0208337	BCL2/NFKB1/KSR1	3
WP_INTEGRATED_CANCER_PATHWAY	WP_INTEGRATED_CANCER_PATHWAY	3/77	44/22091	0.000486542	0.0208337	SMAD3/BCL2/JAK1	3
WP_TROP2_REGULATORY_SIGNALING	WP_TROP2_REGULATORY_SIGNALING	3/77	45/22091	0.000519992	0.0214823	RAC1/BCL2/NFKB1	3
XIE_ST_HSC_S1PR3_OE_UP	XIE_ST_HSC_S1PR3_OE_UP	5/77	189/22091	0.000521756	0.0214823	ABCA1/BLK/NEDD9/BCL2A1/IRAK2	5
FOROUTAN_TGFB_EMT_UP	FOROUTAN_TGFB_EMT_UP	5/77	192/22091	0.00056042	0.0222196	ABCA1/TPST1/ALOX5AP/DSE/NEDD9	5
KASLER_HDAC7_TARGETS_1_UP	KASLER_HDAC7_TARGETS_1_UP	5/77	192/22091	0.00056042	0.0222196	BCL2/TG/CDH17/MTSS1/CUTA	5
RUTELLA_RESPONSE_TO_HGF_VS_CSF2RB_AND_IL4_UP	RUTELLA_RESPONSE_TO_HGF_VS_CSF2RB_AND_IL4_UP	7/77	411/22091	0.000575497	0.0224025	TPST1/CD47/RIN2/SMAD3/CCRL2/NEDD9/B4GALT5	7
PID_PI3KCI_PATHWAY	PID_PI3KCI_PATHWAY	3/77	48/22091	0.000629073	0.0232773	BLK/RAC1/PIK3R5	3
GARGALOVIC_RESPONSE_TO_OXIDIZED_PHOSPHOLIPIDS_BLACK_DN	GARGALOVIC_RESPONSE_TO_OXIDIZED_PHOSPHOLIPIDS_BLACK_DN	2/77	11/22091	0.00064626	0.0232773	SMAD3/MTSS1	2
REACTOME_DERMATAN_SULFATE_BIOSYNTHESIS	REACTOME_DERMATAN_SULFATE_BIOSYNTHESIS	2/77	11/22091	0.00064626	0.0232773	UST/DSE	2
KEGG_FOCAL_ADHESION	KEGG_FOCAL_ADHESION	5/77	199/22091	0.000658994	0.0232773	COMP/ROCK1/RAC1/BCL2/PIK3R5	5
WP_FOCAL_ADHESION	WP_FOCAL_ADHESION	5/77	199/22091	0.000658994	0.0232773	BLK/COMP/ROCK1/RAC1/BCL2	5
RUTELLA_RESPONSE_TO_HGF_UP	RUTELLA_RESPONSE_TO_HGF_UP	7/77	421/22091	0.000663202	0.0232773	TPST1/CD47/RIN2/TNIP2/JAK1/CCRL2/B4GALT5	7
MANALO_HYPOXIA_UP	MANALO_HYPOXIA_UP	5/77	205/22091	0.000753368	0.0260155	ABCA1/TNFRSF10B/NEDD9/MTSS1/ATXN1	5
PARK_TRETINOIN_RESPONSE	PARK_TRETINOIN_RESPONSE	2/77	12/22091	0.00077376	0.0262956	ALOX5AP/SLA	2
KEGG_AMYOTROPHIC_LATERAL_SCLEROSIS_ALS	KEGG_AMYOTROPHIC_LATERAL_SCLEROSIS_ALS	3/77	53/22091	0.000841444	0.0277159	RAC1/PPP3CA/BCL2	3
WP_NRP1_TRIGGERED_SIGNALING_PATHWAYS_IN_PANCREATIC_CANCER	WP_NRP1_TRIGGERED_SIGNALING_PATHWAYS_IN_PANCREATIC_CANCER	3/77	53/22091	0.000841444	0.0277159	RAC1/SMAD3/NFKB1	3
JAATINEN_HEMATOPOIETIC_STEM_CELL_UP	JAATINEN_HEMATOPOIETIC_STEM_CELL_UP	6/77	323/22091	0.00092534	0.029522	PXDN/ETV6/SCHIP1/HOXA5/CNKSR3/F2RL1	6
WP_CARDIAC_HYPERTROPHIC_RESPONSE	WP_CARDIAC_HYPERTROPHIC_RESPONSE	3/77	55/22091	0.000937643	0.029522	RAC1/PPP3CA/NFKB1	3
WP_TGF_BETA_RECEPTOR_SIGNALING	WP_TGF_BETA_RECEPTOR_SIGNALING	3/77	55/22091	0.000937643	0.029522	SMAD3/JAK1/NFKB1	3
REACTOME_NUCLEOTIDE_BINDING_DOMAIN_LEUCINE_RICH_REPEAT_CONTAINING_RECEPTOR_NLR_SIGNALING_PATHWAYS	REACTOME_NUCLEOTIDE_BINDING_DOMAIN_LEUCINE_RICH_REPEAT_CONTAINING_RECEPTOR_NLR_SIGNALING_PATHWAYS	3/77	56/22091	0.000988245	0.0302786	BCL2/IRAK2/NFKB1	3
REACTOME_GLYCOSAMINOGLYCAN_METABOLISM	REACTOME_GLYCOSAMINOGLYCAN_METABOLISM	4/77	126/22091	0.000989957	0.0302786	UST/DSE/B4GALT5/HGSNAT	4
RIGGINS_TAMOXIFEN_RESISTANCE_DN	RIGGINS_TAMOXIFEN_RESISTANCE_DN	5/77	221/22091	0.00105446	0.0314313	UXS1/NFE2L3/CD47/NEDD9/ATXN1	5
CHARAFE_BREAST_CANCER_LUMINAL_VS_BASAL_DN	CHARAFE_BREAST_CANCER_LUMINAL_VS_BASAL_DN	7/77	456/22091	0.00105701	0.0314313	SCHIP1/WDR1/SMAD3/HOXA5/DSE/F2RL1/MAML2	7
KEGG_AXON_GUIDANCE	KEGG_AXON_GUIDANCE	4/77	129/22091	0.00108036	0.0316855	ROCK1/RAC1/PPP3CA/SEMA4A	4
WP_TGF_BETA_RECEPTOR_SIGNALING_IN_SKELETAL_DYSPLASIAS	WP_TGF_BETA_RECEPTOR_SIGNALING_IN_SKELETAL_DYSPLASIAS	3/77	59/22091	0.00115033	0.0332818	SMAD3/JAK1/NFKB1	3
WP_TGF_BETA_SIGNALING_PATHWAY	WP_TGF_BETA_SIGNALING_PATHWAY	4/77	132/22091	0.0011764	0.0334218	ROCK1/RAC1/SMAD3/NEDD9	4
WP_PI3K_AKT_SIGNALING_PATHWAY	WP_PI3K_AKT_SIGNALING_PATHWAY	6/77	339/22091	0.00118639	0.0334218	COMP/RAC1/BCL2/JAK1/PIK3R5/NFKB1	6
RUTELLA_RESPONSE_TO_CSF2RB_AND_IL4_UP	RUTELLA_RESPONSE_TO_CSF2RB_AND_IL4_UP	6/77	341/22091	0.00122262	0.0335606	TPST1/CD47/TNIP2/JAK1/NDE1/B4GALT5	6
WATANABE_ULCERATIVE_COLITIS_WITH_CANCER_DN	WATANABE_ULCERATIVE_COLITIS_WITH_CANCER_DN	2/77	15/22091	0.00122267	0.0335606	SLA/NEDD9	2
JOHNSTONE_PARVB_TARGETS_2_DN	JOHNSTONE_PARVB_TARGETS_2_DN	6/77	344/22091	0.00127856	0.0346505	TPST1/PPP3CA/RIN2/DDAH2/F2RL1/CUTA	6
REACTOME_SIGNALING_BY_INTERLEUKINS	REACTOME_SIGNALING_BY_INTERLEUKINS	7/77	474/22091	0.0013211	0.035356	SMAD3/BCL2/TNIP2/JAK1/IRAK2/IL31RA/NFKB1	7
KEGG_NATURAL_KILLER_CELL_MEDIATED_CYTOTOXICITY	KEGG_NATURAL_KILLER_CELL_MEDIATED_CYTOTOXICITY	4/77	137/22091	0.00134954	0.035535	TNFRSF10B/RAC1/PPP3CA/PIK3R5	4
HOSHIDA_LIVER_CANCER_SUBCLASS_S1	HOSHIDA_LIVER_CANCER_SUBCLASS_S1	5/77	235/22091	0.00138427	0.035535	CD47/RIN2/ALOX5AP/SLA/BCL2A1	5
BIOCARTA_IL7_PATHWAY	BIOCARTA_IL7_PATHWAY	2/77	16/22091	0.00139418	0.035535	BCL2/JAK1	2
REACTOME_MAP3K8_TPL2_DEPENDENT_MAPK1_3_ACTIVATION	REACTOME_MAP3K8_TPL2_DEPENDENT_MAPK1_3_ACTIVATION	2/77	16/22091	0.00139418	0.035535	TNIP2/NFKB1	2
REACTOME_SEMAPHORIN_INTERACTIONS	REACTOME_SEMAPHORIN_INTERACTIONS	3/77	64/22091	0.00145599	0.0359677	ROCK1/RAC1/SEMA4A	3
ALCALAY_AML_BY_NPM1_LOCALIZATION_UP	ALCALAY_AML_BY_NPM1_LOCALIZATION_UP	4/77	140/22091	0.00146156	0.0359677	NFE2L3/SCHIP1/HOXA5/LRIG1	4
WP_NEUROINFLAMMATION_AND_GLUTAMATERGIC_SIGNALING	WP_NEUROINFLAMMATION_AND_GLUTAMATERGIC_SIGNALING	4/77	140/22091	0.00146156	0.0359677	SMAD3/BCL2/JAK1/NFKB1	4
REACTOME_IL_6_TYPE_CYTOKINE_RECEPTOR_LIGAND_INTERACTIONS	REACTOME_IL_6_TYPE_CYTOKINE_RECEPTOR_LIGAND_INTERACTIONS	2/77	17/22091	0.00157651	0.0378522	JAK1/IL31RA	2
WP_NCRNAS_INVOLVED_IN_STAT3_SIGNALING_IN_HEPATOCELLULAR_CARCINOMA	WP_NCRNAS_INVOLVED_IN_STAT3_SIGNALING_IN_HEPATOCELLULAR_CARCINOMA	2/77	17/22091	0.00157651	0.0378522	JAK1/NFKB1	2
WP_SARS_COV_2_INNATE_IMMUNITY_EVASION_AND_CELL_SPECIFIC_IMMUNE_RESPONSE	WP_SARS_COV_2_INNATE_IMMUNITY_EVASION_AND_CELL_SPECIFIC_IMMUNE_RESPONSE	3/77	66/22091	0.00159117	0.0378522	SMAD3/JAK1/NFKB1	3
WP_RAC1_PAK1_P38_MMP2_PATHWAY	WP_RAC1_PAK1_P38_MMP2_PATHWAY	3/77	68/22091	0.00173397	0.0407958	RAC1/TNIP2/NFKB1	3
WP_TH17_CELL_DIFFERENTIATION_PATHWAY	WP_TH17_CELL_DIFFERENTIATION_PATHWAY	3/77	69/22091	0.00180827	0.0420815	PPP3CA/JAK1/NFKB1	3
KEGG_WNT_SIGNALING_PATHWAY	KEGG_WNT_SIGNALING_PATHWAY	4/77	151/22091	0.00192789	0.0435885	ROCK1/RAC1/PPP3CA/SMAD3	4
WP_HEPATITIS_B_INFECTION	WP_HEPATITIS_B_INFECTION	4/77	151/22091	0.00192789	0.0435885	SMAD3/BCL2/JAK1/NFKB1	4
REACTOME_INTERLEUKIN_17_SIGNALING	REACTOME_INTERLEUKIN_17_SIGNALING	3/77	71/22091	0.00196277	0.0435885	TNIP2/IRAK2/NFKB1	3
BIOCARTA_MAL_PATHWAY	BIOCARTA_MAL_PATHWAY	2/77	19/22091	0.00197329	0.0435885	ROCK1/RAC1	2
REACTOME_INTERLEUKIN_1_FAMILY_SIGNALING	REACTOME_INTERLEUKIN_1_FAMILY_SIGNALING	4/77	152/22091	0.00197482	0.0435885	SMAD3/TNIP2/IRAK2/NFKB1	4
YAO_TEMPORAL_RESPONSE_TO_PROGESTERONE_CLUSTER_0	YAO_TEMPORAL_RESPONSE_TO_PROGESTERONE_CLUSTER_0	3/77	72/22091	0.00204301	0.0446335	ABCA1/FOXP1/RIN2	3
KEGG_CHRONIC_MYELOID_LEUKEMIA	KEGG_CHRONIC_MYELOID_LEUKEMIA	3/77	73/22091	0.00212527	0.045487	SMAD3/PIK3R5/NFKB1	3
WP_CHROMOSOMAL_AND_MICROSATELLITE_INSTABILITY_IN_COLORECTAL_CANCER	WP_CHROMOSOMAL_AND_MICROSATELLITE_INSTABILITY_IN_COLORECTAL_CANCER	3/77	73/22091	0.00212527	0.045487	RAC1/SMAD3/BCL2	3
JINESH_BLEBBISHIELD_TO_IMMUNE_CELL_FUSION_PBSHMS_UP	JINESH_BLEBBISHIELD_TO_IMMUNE_CELL_FUSION_PBSHMS_UP	6/77	382/22091	0.00217033	0.045487	TNFRSF10B/NFE2L3/WDR1/RAC1/SMAD3/FAM107B	6
REACTOME_NOTCH4_INTRACELLULAR_DOMAIN_REGULATES_TRANSCRIPTION	REACTOME_NOTCH4_INTRACELLULAR_DOMAIN_REGULATES_TRANSCRIPTION	2/77	20/22091	0.00218761	0.045487	SMAD3/MAML2	2
PID_AVB3_INTEGRIN_PATHWAY	PID_AVB3_INTEGRIN_PATHWAY	3/77	74/22091	0.00220955	0.045487	PI4KB/ROCK1/RAC1	3
WP_PROLACTIN_SIGNALING_PATHWAY	WP_PROLACTIN_SIGNALING_PATHWAY	3/77	74/22091	0.00220955	0.045487	RAC1/JAK1/NFKB1	3
WP_BURN_WOUND_HEALING	WP_BURN_WOUND_HEALING	3/77	75/22091	0.00229589	0.0457082	SMAD3/BCL2/NFKB1	3
SMIRNOV_CIRCULATING_ENDOTHELIOCYTES_IN_CANCER_UP	SMIRNOV_CIRCULATING_ENDOTHELIOCYTES_IN_CANCER_UP	4/77	159/22091	0.0023257	0.0457082	ABCA1/SLA/DSE/B4GALT5	4
WP_EGF_EGFR_SIGNALING_PATHWAY	WP_EGF_EGFR_SIGNALING_PATHWAY	4/77	159/22091	0.0023257	0.0457082	ROCK1/PXDN/RAC1/JAK1	4
KEGG_VEGF_SIGNALING_PATHWAY	KEGG_VEGF_SIGNALING_PATHWAY	3/77	76/22091	0.00238429	0.0457082	RAC1/PPP3CA/PIK3R5	3
SEKI_INFLAMMATORY_RESPONSE_LPS_UP	SEKI_INFLAMMATORY_RESPONSE_LPS_UP	3/77	76/22091	0.00238429	0.0457082	SCHIP1/CCRL2/NEURL3	3
BIOCARTA_CERAMIDE_PATHWAY	BIOCARTA_CERAMIDE_PATHWAY	2/77	21/22091	0.00241243	0.0457082	BCL2/NFKB1	2
OUYANG_PROSTATE_CANCER_MARKERS	OUYANG_PROSTATE_CANCER_MARKERS	2/77	21/22091	0.00241243	0.0457082	BCL2/EZH2	2
REACTOME_INFLAMMASOMES	REACTOME_INFLAMMASOMES	2/77	21/22091	0.00241243	0.0457082	BCL2/NFKB1	2
WP_HEMATOPOIETIC_STEM_CELL_GENE_REGULATION_BY_GABP_ALPHA_BETA_COMPLEX	WP_HEMATOPOIETIC_STEM_CELL_GENE_REGULATION_BY_GABP_ALPHA_BETA_COMPLEX	2/77	21/22091	0.00241243	0.0457082	ETV6/BCL2	2
PHONG_TNF_RESPONSE_VIA_P38_PARTIAL	PHONG_TNF_RESPONSE_VIA_P38_PARTIAL	4/77	164/22091	0.00260118	0.0486547	TPST1/TNFRSF10B/SMAD3/HOXA5	4
BIOCARTA_RAS_PATHWAY	BIOCARTA_RAS_PATHWAY	2/77	22/22091	0.0026477	0.0486547	RAC1/NFKB1	2
KEGG_GLYCOSAMINOGLYCAN_BIOSYNTHESIS_CHONDROITIN_SULFATE	KEGG_GLYCOSAMINOGLYCAN_BIOSYNTHESIS_CHONDROITIN_SULFATE	2/77	22/22091	0.0026477	0.0486547	UST/DSE	2
WP_CHEMOKINE_SIGNALING_PATHWAY	WP_CHEMOKINE_SIGNALING_PATHWAY	4/77	165/22091	0.00265885	0.0486547	ROCK1/RAC1/PIK3R5/NFKB1	4
GAVIN_FOXP3_TARGETS_CLUSTER_P2	GAVIN_FOXP3_TARGETS_CLUSTER_P2	3/77	81/22091	0.00285791	0.0499566	FOXN3/BCL2/NEURL3	3
HINATA_NFKB_TARGETS_FIBROBLAST_UP	HINATA_NFKB_TARGETS_FIBROBLAST_UP	3/77	81/22091	0.00285791	0.0499566	RAC1/MTSS1/NFKB1	3
SHAFFER_IRF4_TARGETS_IN_ACTIVATED_B_LYMPHOCYTE	SHAFFER_IRF4_TARGETS_IN_ACTIVATED_B_LYMPHOCYTE	3/77	81/22091	0.00285791	0.0499566	RPP30/RIN2/BCL2	3
BIOCARTA_NTHI_PATHWAY	BIOCARTA_NTHI_PATHWAY	2/77	23/22091	0.00289333	0.0499566	SMAD3/NFKB1	2
PID_PRL_SIGNALING_EVENTS_PATHWAY	PID_PRL_SIGNALING_EVENTS_PATHWAY	2/77	23/22091	0.00289333	0.0499566	ROCK1/RAC1	2
WP_ESTROGEN_SIGNALING_PATHWAY	WP_ESTROGEN_SIGNALING_PATHWAY	2/77	23/22091	0.00289333	0.0499566	BCL2/NFKB1	2
WP_REGULATION_OF_APOPTOSIS_BY_PARATHYROID_HORMONE_RELATED_PROTEIN	WP_REGULATION_OF_APOPTOSIS_BY_PARATHYROID_HORMONE_RELATED_PROTEIN	2/77	23/22091	0.00289333	0.0499566	BCL2/BCL2A1	2
